# Supplementary material
Source: publisher figshare collection journal article supplement (https://aacr.figshare.com/ndownloader/files/39842720)

# S4 Clustering heatmap analysis for ER $\alpha$ , H3K4me3 and H3K27me3 peak caller score

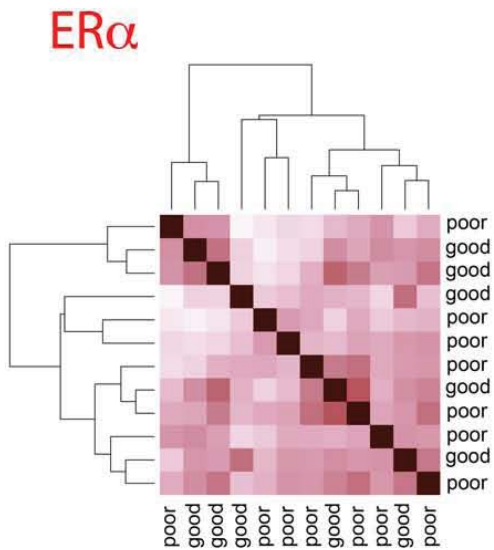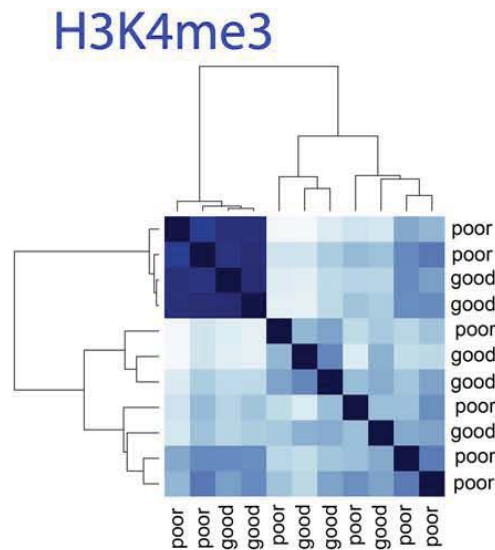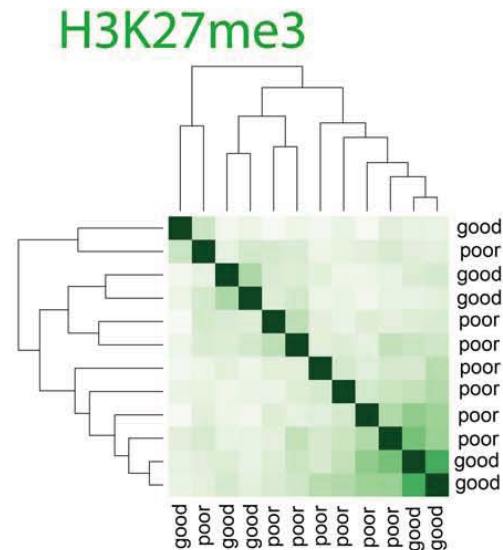

## read count correlation

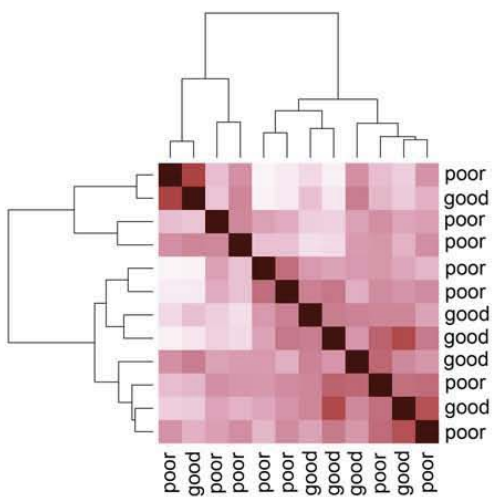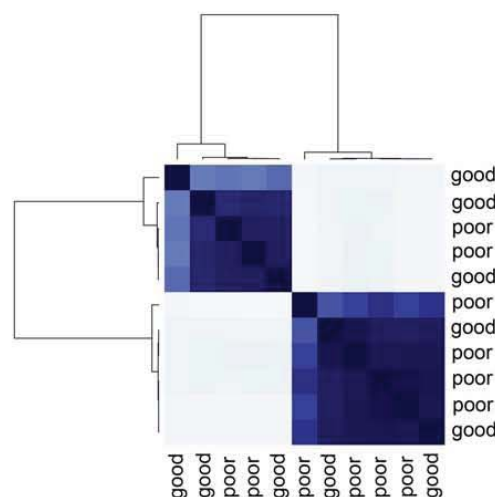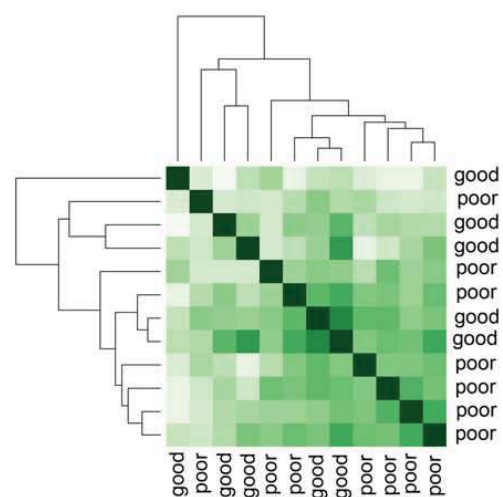

Supplement: Supplementary file 1 [file 39842720]
